# Supplementary material for: Exposure to Hyperbaric Oxygen Intensified Vancomycin-Induced Nephrotoxicity in Rats
Source: PLoS One. 2016 Apr 19;11(4):e0152554. doi: 10.1371/journal.pone.0152554 (PMC4836689; doi:10.1371/journal.pone.0152554)
Supplement: S1 Table — (XLS) [file pone.0152554.s004.xls]

## Sheet: S 1 Table 1
Table 1: Comparison of weight, renal function, electrolytes and trough vancomycin levels between the treatment arms
	HBO-		SD	HBO+		SD	p Value
	Median	Mean		Median	Mean
0	180	180	7.4	181	179.39	5.9
0	205	202.6	10.6	189	190.9	12.6	0.008
K (mg/dL)	5.8	5.8	0.4	5.8	5.8	0.3	0.483
Na (mg/dL)	142	141.9	1.8	142	141.4	1.2	0.485
Ca (mg/dL)	10.4	10.2	0.9	10.7	10.6	0.5	0.044
Mg (mg/dL)	2.9	3.1	0.5	3.6	3.6	0.6	0.014
Urea (mg/dL)	48.9	52.6	15.4	82	99.6	48.1	<0.001
Creatinin (mg/dL)	0.17	0.16	0.06	0.32	0.42	0.38	0.001
VMC (µg/mL)	5	6.7	4.9	18.6	27.8	30.2	0.078
K = potassium, Na= sodium, Ca = calcium, Mg = magnesium, SD = standard deviation
